# Supplementary material
Source: PubMed Central journal article supplement (PMC8259713)
Supplement: NIHMS1712750-supplement-Supplementary_materials.pdf [file NIHMS1712750-supplement-Supplementary_materials.pdf]

|               | coef  | exp(coef) | se(coef) | z     | Pr(> z )        |
|---------------|-------|-----------|----------|-------|-----------------|
| ISV(Yes)      | -0.55 | 0.57      | 0.45     | -1.22 | 0.22            |
| WBRT(D1)      | -0.82 | 0.43      | 0.43     | -1.88 | 0.059           |
| WBRT(D15)     | -0.38 | 0.68      | 0.42     | -0.89 | 0.37            |
| ISV:WBRT(D1)  | -0.22 | 0.799     | 0.64     | -0.34 | 0.73            |
| ISV:WBRT(D15) | -2.05 | 0.12      | 0.72     | -2.82 | <b>0.0047**</b> |

**Supplementary Table S1:** Results from Cox regression model (\*\* $p < 0.01$ , which indicates that the significant effect of the interaction effect between ISV and WBRT (D15)).

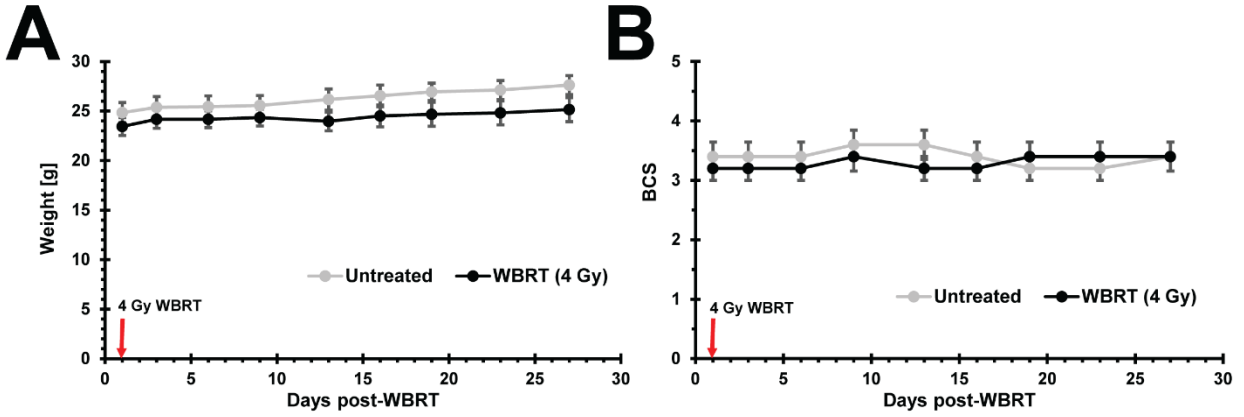

**Supplementary Figure S1:** Mouse weight (**A**) and Body Condition Score (BCS, **B**) were monitored to determine toxicity up to 4 weeks after receiving whole brain radiotherapy (WBRT, 4 Gy×1) or sham control.

## A Flow cytometry

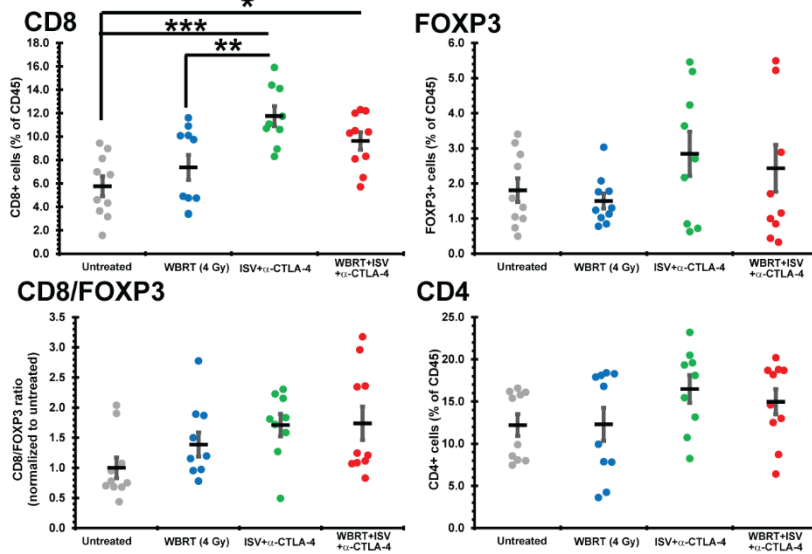

## B qPCR

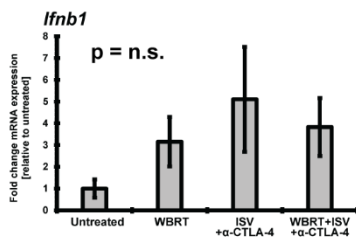

## C

### Survival: Treg depletion ('DEREG' mice)

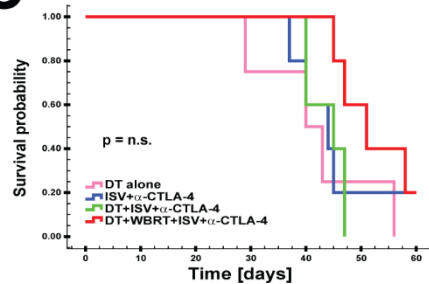

**Supplementary Figure S2:** (A) Flow cytometric analysis of B78 tumors after WBRT + ISV + anti-CTLA-4 treatment compared to untreated and single treatment controls (\*\* $p < 0.001$ , \*\* $p < 0.01$ , \* $p < 0.05$ , mean  $\pm$  S.E. with marker representing individual data points, ANOVA with post-hoc Bonferroni,  $n \geq 9$ , at least 2 independent animal experiments). (B) qRT-PCR analysis for expression of gene *Ifnb1* in melanoma brain tumors at 5 days after WBRT + ISV + anti-CTLA-4, compared to single treatments and untreated controls ( $p = n.s.$ , shown as fold-change increase from untreated controls, mean  $\pm$  S.E., ANOVA with post-hoc Bonferroni,  $n \geq 8$  in at least 2 independent animal experiments). (C) Survival curve for 'DEREG' mice receiving diphtheria toxin (DT) to deplete Tregs and treatment controls ( $p = n.s.$ , Kaplan-Meier,  $n \geq 5$  in a single animal experiment).

**Contralateral Normal Brain**

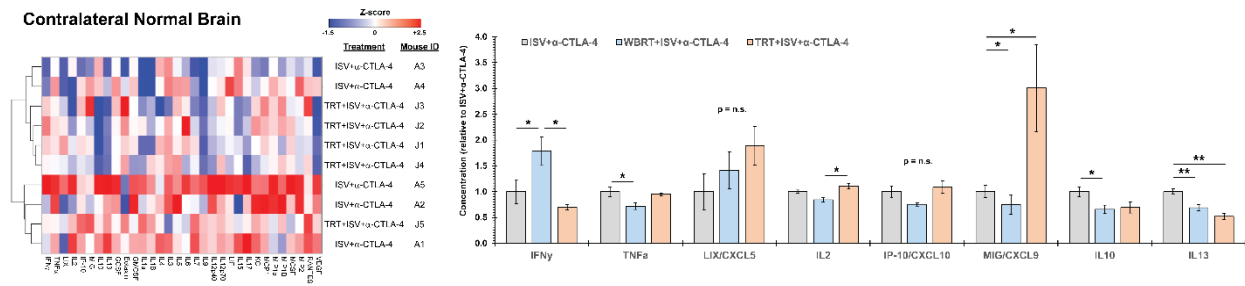

**Supplementary Figure S3:** Heatmap of cytokines/ chemokines analyzed via multiplex immunoassay for contralateral normal brain in BrMet-bearing mice treated with TRT <sup>90</sup>Y-NM600 with and without ISV + anti-CTLA-4 regimen (z-scores; n=5 mice in a single animal experiment). Concentrations of cytokines/ chemokines in mice treated with TRT <sup>90</sup>Y-NM600 or WBRT with ISV + anti-CTLA-4 regimen, graphed relative to ISV + anti-CTLA-4 regimen alone (\*\*p<0.01, \*p<0.05, mean±S.E., ANOVA with post-hoc Bonferroni, n=5 in a single animal experiment).
